# Supplementary material
Source: MDPI journal article supplement (https://www.mdpi.com/2075-163X/13/2/292)
Supplement: s1 [file s1]

**Table S1.** Conditions and results of experiments on synthesis of redleigeite, (Red), hawthorneite (Hwt) and lindsleyite (Ldy) at 1.8, 3.5 and 5 GPa.

| Run no. | Mineral composition, wt. % | Fluid, wt. %                          | Content of fluid in the system, % | Run duration, h | T, °C | P, GPa | Synthetic phases |     |     |
|---------|----------------------------|---------------------------------------|-----------------------------------|-----------------|-------|--------|------------------|-----|-----|
|         |                            |                                       |                                   |                 |       |        | Red              | Hwt | Ldy |
| Ba-1    | Chromite, ilmenite (1:1)   | BaCO <sub>3</sub> , oxalic acid (9:1) | 20                                | 24              | 1200  | 5      | —                | +   | +   |
| Ba-2    | Chromite, ilmenite (1:1)   | BaCO <sub>3</sub> , oxalic acid (9:1) | 10                                | 48              | 1200  | 5      | —                | +   | +   |
| Ba-Ti   | Chromite, rutile (1:1)     | BaCO <sub>3</sub> , oxalic acid (9:1) | 10                                | 24              | 1200  | 5      | +                | —   | +   |
| 3Ba-1   | Chromite, ilmenite (1:1)   | BaCO <sub>3</sub> , oxalic acid (9:1) | 10                                | 1               | 1200  | 3.5    | —                | +   | +   |
| 3Ba-Ti  | Chromite, rutile (1:1)     | BaCO <sub>3</sub> , oxalic acid (9:1) | 10                                | 1               | 1200  | 3.5    | +                | —   | +   |
| Ba-1.8  | Chromite, ilmenite (1:1)   | BaCO <sub>3</sub> , oxalic acid (9:1) | 10                                | 25              | 100   | 1.8    | +                | +   | —   |

**Table S2.** Conditions and results of experiments on synthesis of priderite, (Pdr), yimengite (Yim) and mathiasite (Mts) at 3.5 and 5 GPa, 1200 °C.

| Run no. | Mineral composition, wt. % | Fluid, wt. %                                        | Content of fluid in the system, % | Run duration, h | P, GPa | Synthetic phases |     |     |
|---------|----------------------------|-----------------------------------------------------|-----------------------------------|-----------------|--------|------------------|-----|-----|
|         |                            |                                                     |                                   |                 |        | Pdr              | Yim | Mts |
| Sp1     | Chromite                   | K <sub>2</sub> CO <sub>3</sub> , oxalic acid (10:0) | 30                                | 21              | 5      | —                | —   | —   |
| Sp2     | Chromite, rutile (1:1)     | K <sub>2</sub> CO <sub>3</sub> , oxalic acid (9:1)  | 20                                | 23              | 5      | +                | —   | —   |
| A1      | Chromite, rutile (1:1)     | K <sub>2</sub> CO <sub>3</sub> , oxalic acid (9:1)  | 10                                | 20              | 5      | +                | —   | +   |
| A2      | Chromite, rutile (2:1)     | K <sub>2</sub> CO <sub>3</sub> , oxalic acid (9:1)  | 10                                | 24              | 5      | +                | —   | +   |
| B1      | Chromite, ilmenite (1:1)   | K <sub>2</sub> CO <sub>3</sub> , oxalic acid (9:1)  | 10                                | 22              | 5      | +                | +   | —   |
| B1-1    | Chromite, ilmenite (1:1)   | K <sub>2</sub> CO <sub>3</sub> , oxalic acid (7:3)  | 10                                | 22              | 5      | —                | +   | +   |
| B1-2    | Chromite, ilmenite (1:1)   | K <sub>2</sub> CO <sub>3</sub> , oxalic acid (5:5)  | 10                                | 22              | 5      | —                | +   | —   |
| B1-3    | Chromite, ilmenite (1:1)   | K <sub>2</sub> CO <sub>3</sub> , oxalic acid (3:7)  | 10                                | 22              | 5      | —                | —   | —   |
| B1-4    | Chromite, ilmenite (1:1)   | K <sub>2</sub> CO <sub>3</sub> , oxalic acid (1:9)  | 10                                | 22              | 5      | —                | —   | —   |
| B2      | Chromite, ilmenite (2:1)   | K <sub>2</sub> CO <sub>3</sub> , oxalic acid (9:1)  | 10                                | 20              | 5      | +                | +   | —   |
| M-0     | Chromite, ilmenite (1:1)   | K <sub>2</sub> CO <sub>3</sub> , oxalic acid (9:1)  | 10                                | 8               | 3.5    | —                | +   | +   |
| M-1     | Chromite, ilmenite (1:1)   | K <sub>2</sub> CO <sub>3</sub> , oxalic acid (7:3)  | 10                                | 8               | 3.5    | —                | +   | +   |
| M-2     | Chromite, ilmenite (1:1)   | K <sub>2</sub> CO <sub>3</sub> , oxalic acid (5:5)  | 10                                | 8               | 3.5    | —                | +   | +   |

|     |                             |                                                       |    |   |     |   |   |   |
|-----|-----------------------------|-------------------------------------------------------|----|---|-----|---|---|---|
| M-3 | Chromite, ilmenite<br>(1:1) | K <sub>2</sub> CO <sub>3</sub> , oxalic acid<br>(3:7) | 10 | 8 | 3.5 | — | — | — |
| M-4 | Chromite, ilmenite<br>(1:1) | K <sub>2</sub> CO <sub>3</sub> , oxalic acid<br>(1:9) | 10 | 8 | 3.5 | — | — | — |

**Table S3.** Main crystallographic characteristics, details of the X-ray experiment and structure refinement parameters for the synthetic yimengite.

| Chemical formula                                                           |                      | K <sub>0.90</sub> Ti <sub>5.16</sub> Cr <sub>2.94</sub> Fe <sub>2.54</sub> Mg <sub>0.87</sub> Al <sub>0.22</sub> Mn <sub>0.30</sub> O <sub>19</sub> |  |
|----------------------------------------------------------------------------|----------------------|-----------------------------------------------------------------------------------------------------------------------------------------------------|--|
| Formula weight                                                             |                      | 923.80                                                                                                                                              |  |
| Temperature, K                                                             |                      | 90                                                                                                                                                  |  |
| System, sp.gr., Z                                                          |                      | Hexagonal, <i>P</i> 6 <sub>3</sub> / <i>mmc</i> (194), 4                                                                                            |  |
| <i>a</i> = <i>b</i> , Å                                                    |                      | 5.8920(2)                                                                                                                                           |  |
| <i>c</i> , Å                                                               |                      | 23.0113(8)                                                                                                                                          |  |
| <i>V</i> , Å <sup>3</sup>                                                  |                      | 691.82(6)                                                                                                                                           |  |
| $\rho_{\text{calc}}$ , g/cm <sup>-3</sup>                                  |                      | 4.435                                                                                                                                               |  |
| $\mu$ , mm <sup>-1</sup>                                                   |                      | 9.400                                                                                                                                               |  |
| <i>F</i> (000)                                                             |                      | 879                                                                                                                                                 |  |
| Radiation                                                                  |                      | Synchrotron source<br>( $\lambda$ = 0.74539 Å)                                                                                                      |  |
| Detector                                                                   |                      | Rayonix SX165 with CCD chip                                                                                                                         |  |
| $\theta_{\text{min}}/\theta_{\text{max}}$ , deg                            |                      | 3.71/62.98 (0.71 Å)                                                                                                                                 |  |
| Ranges of indices <i>h</i> , <i>k</i> , <i>l</i>                           | $-5 \leq h \leq 8$   |                                                                                                                                                     |  |
|                                                                            | $-8 \leq k \leq 7$   |                                                                                                                                                     |  |
|                                                                            | $-29 \leq l \leq 32$ |                                                                                                                                                     |  |
| Measured reflections                                                       |                      | 4094                                                                                                                                                |  |
|                                                                            |                      | 425                                                                                                                                                 |  |
| Independent reflections                                                    |                      | <i>R</i> <sub>int</sub> = 0.0763                                                                                                                    |  |
|                                                                            |                      | <i>R</i> <sub>σ</sub> = 0.0267                                                                                                                      |  |
| Number of parameters                                                       |                      | 53                                                                                                                                                  |  |
| <i>S</i>                                                                   |                      | 1.102                                                                                                                                               |  |
| Refinement technique; weighting scheme                                     |                      | Least-squares method on <i>F</i> <sup>2</sup> ,<br>$w = 1/[\sigma^2(F_o^2) + (0.1002P)^2 + 3.6783P]$ $r_{\text{de}} P = (F_o^2 + 2F_c^2)/3$         |  |
| <i>R</i> <sub>1</sub> ; <i>wR</i> <sub>2</sub> [ <i>I</i> ≥2σ( <i>I</i> )] |                      | <i>R</i> <sub>1</sub> = 0.0470; <i>wR</i> <sub>2</sub> = 0.1528                                                                                     |  |
| <i>R</i> <sub>1</sub> ; <i>wR</i> <sub>2</sub>                             |                      | <i>R</i> <sub>1</sub> = 0.0527; <i>wR</i> <sub>2</sub> = 0.1625                                                                                     |  |
| $\Delta \rho_{\text{max}}/\Delta \rho_{\text{min}}$ , eÅ <sup>-3</sup>     |                      | 1.60/-1.08                                                                                                                                          |  |

**Table S4.** Atomic coordinates and equivalent isotropic parameters for the synthetic yimengite.

| No | Atom       | <i>x</i>    | <i>y</i>   | <i>z</i>    | <i>U</i> <sub>eq</sub> , Å <sup>2</sup> |
|----|------------|-------------|------------|-------------|-----------------------------------------|
| 1  | Ti, Mn     | 1/3         | 2/3        | 0.31052(8)  | 0.0188(6)                               |
| 2  | Cr, Ti, Fe | 0.33366(19) | 0.16683(9) | 0.39311(4)  | 0.0204(5)                               |
| 3  | Fe, Mg     | 1/3         | 2/3        | 0.47214(8)  | 0.0133(6)                               |
| 4  | Cr, Al     | 0           | 0.000000   | 1/2         | 0.0189(7)                               |
| 5  | Cr, Al     | 0           | 0.000000   | 1/4         | 0.0249(7)                               |
| 6  | K1         | 2/3         | 0.333333   | 0.250000    | 0.0166(12)                              |
| 7  | O1         | 0.1472(4)   | 0.2945(9)  | 0.4461(2)   | 0.0197(9)                               |
| 8  | O2         | 2/3         | 0.333333   | 0.4402(4)   | 0.0208(15)                              |
| 9  | O3         | 0           | 0.000000   | 0.3469(4)   | 0.0226(16)                              |
| 10 | O4         | 0.4988(4)   | 0.5012(4)  | 0.35055(19) | 0.0198(10)                              |
| 11 | O5         | 0.1846(7)   | 0.3693(14) | 0.250000    | 0.0247(14)                              |

**Table S5.** Parameters of coordination polyhedral in the structure of synthetic yimengite.

|                              | $A$      | $M_1$              | $M_2$              | $M_3$              | $M_4$              | $M_5$                       |
|------------------------------|----------|--------------------|--------------------|--------------------|--------------------|-----------------------------|
| No. No                       | 6        | 4                  | 5                  | 3                  | 1                  | 2                           |
| Metal                        | $K^+$    | $Cr^{3+}, Al^{3+}$ | $Cr^{3+}, Al^{3+}$ | $Fe^{2+}, Mg^{2+}$ | $Mn^{2+}, Ti^{4+}$ | $Cr^{3+}, Fe^{2+}, Ti^{4+}$ |
| Volume, $\text{\AA}^3$       | 57.4165  | 9.7138             | 6.8720             | 4.0915             | 10.2964            | 10.5044                     |
| Min. $l(M-O)$ , $\text{\AA}$ | 2.879(5) | 1.950(5)           | 1.886(8)           | 1.993(5)           | 1.925(4)           | 1.965(4)                    |
| Av. $l(M-O)$ , $\text{\AA}$  | 2.9156   | 1.9495             | 2.0238             | 1.9987             | 1.9991             | 1.9991                      |
| Max. $l(M-O)$ , $\text{\AA}$ | 2.952(7) | 1.950(5)           | 2.230(10)          | 2.017(10)          | 2.058(6)           | 2.020(5)                    |
| Degree of distortion         | 0.01244  | 0.0                | 0.08144            | 0.00463            | 0.03341            | 0.01096                     |

**Table S6.** Metal ion radii  $R_M$  and metal–oxygen bond lengths  $l(M-O)$ .

|                            | <b>Al</b> | <b>Mg</b> | <b>Fe</b> | <b>Mn</b> | <b>Cr</b> | <b>Ti</b> |
|----------------------------|-----------|-----------|-----------|-----------|-----------|-----------|
| $R_M$ , $\text{\AA}$       | 1.18      | 1.45      | 1.56      | 1.61      | 1.66      | 1.76      |
| $l(M-O)$ , $\text{\AA}$    | 1.62      | 1.93      | 2.04      | 2.09      | 2.14      | 2.24      |
| Oxidation state in mineral | 3+        | 2+        | 2+        | 2+        | 3+        | 4+        |

**Table S7.** Cation distribution in the structures of potassium and barium minerals of the magnetoplumbite group.

| <b>Mineral or synthetic analogue/structural site</b> | $A$   | $M_1$         | $M_2$     | $M_3$                  | $M_4$         | $M_5$             | <b>References</b> |
|------------------------------------------------------|-------|---------------|-----------|------------------------|---------------|-------------------|-------------------|
| Hawthorneite                                         | Ba    | Cr            | $Fe^{3+}$ | $Fe^{2+}, Mg$          | Ti            | $Cr, Fe^{3+}$     | [28, 30]          |
| Haggertyite                                          | Ba, K | Ti, $Fe^{3+}$ | $Fe^{3+}$ | $Fe^{2+}$              | Ti            | Ti, $Fe^{2+}$ ,   | [28, 31]          |
| Batiferrite                                          | Ba    | $Fe^{3+}$     | $Fe^{3+}$ | $Fe^{2+}$              | Ti, $Fe^{3+}$ | $Fe^{3+}, Ti$     | [28]              |
| Barioferrite                                         | Ba    | $Fe^{3+}$     | $Fe^{3+}$ | $Fe^{3+}$              | $Fe^{3+}$     | $Fe^{3+}$         | [28]              |
| Yimengite                                            | K     | $Fe^{3+}$     | $Fe^{3+}$ | $Mg, Fe^{2+}$          | Ti            | Cr                | [28, 29]          |
| Yimengite (synth.)                                   | K     | Cr, Al        | Cr, Al    | $Fe^{2+}, Mg, Mn^{2+}$ | Ti            | Cr, $Fe^{2+}, Ti$ | This study        |
